# Supplementary material for: High Resolution Magic Angle Spinning Proton NMR Study of Alzheimer’s Disease with Mouse Models
Source: MDPI journal article supplement (doi:10.3390/metabo12030253), 2022-03-17
Supplement: s1 [file s1]

**Table S1. Major contributing metabolites for identified spectral regions. Abbreviations: adenosine triphosphate (ATP), N-acetylaspartate (NAA), glycerophosphocholine (GPC), lactate (Lac), choline (Chol), myo-inositol (m-Ino), tyrosine (Tyr), serine (Ser), phosphocreatine (PCr), creatine (Cr), glucose (Glc), alanine (Ala), glutathione (GSH), glutamine (Gln), glutamate (Glu), phosphoryl choline (Pchol), valine (Val), glycine (Gly), taurine (Tau), scyllo-inositol (s-Ino), phenylalanine (Phe), histidine (His), aspartate (Asp), pyruvate (Pyr), gamma-aminobutyric acid (GABA), N-acetylaspartylglutamic acid (NAAG), acetone (Acet), To Be Determined (TBD).**

|                  |                                                      |
|------------------|------------------------------------------------------|
| <b>4.40-4.38</b> | <i>ATP, NAA</i>                                      |
| <b>4.33-4.31</b> | <i>GPC</i>                                           |
| <b>4.11-4.09</b> | <i>Lac</i>                                           |
| <b>4.06-4.04</b> | <i>Chol, m-Ino, Tyr</i>                              |
| <b>4.03-4.01</b> | <i>TBD</i>                                           |
| <b>3.94-3.92</b> | <i>Ser, PCr, Tyr</i>                                 |
| <b>3.91-3.89</b> | <i>Cr, GPC</i>                                       |
| <b>3.88-3.87</b> | <i>Glc</i>                                           |
| <b>3.85-3.83</b> | <i>GPC, Glc, Ser,</i>                                |
| <b>3.78-3.73</b> | <i>Ala, GSH, Glycerol, Glc, Gln, Glu</i>             |
| <b>3.70-3.68</b> | <i>Glc</i>                                           |
| <b>3.67-3.65</b> | <i>GPC</i>                                           |
| <b>3.64-3.62</b> | <i>Glycerol, Pchol</i>                               |
| <b>3.61-3.59</b> | <i>GPC, m-Ino, Val</i>                               |
| <b>3.56-3.53</b> | <i>Glycerol, Gly</i>                                 |
| <b>3.52-3.51</b> | <i>Glc, m-Ino,</i>                                   |
| <b>3.44-3.40</b> | <i>Tau, Glc</i>                                      |
| <b>3.35-3.33</b> | <i>s-Ino</i>                                         |
| <b>3.28-3.24</b> | <i>m-Ino, Phe, Tau,</i>                              |
| <b>3.23-3.21</b> | <i>Glc, His, Phosphoryl ethanolamine, GPC, Pchol</i> |
| <b>3.20-3.19</b> | <i>Chol, Homocarnosine, Tyr</i>                      |
| <b>3.14-3.12</b> | <i>His</i>                                           |
| <b>3.01-2.99</b> | <i>GABA, Homocarnosine, Histamine</i>                |
| <b>2.98-2.97</b> | <i>Histamine, GSH</i>                                |
| <b>2.83-2.81</b> | <i>TBD</i>                                           |
| <b>2.80-2.78</b> | <i>Asp</i>                                           |
| <b>2.72-2.70</b> | <i>NAAG</i>                                          |
| <b>2.69-2.68</b> | <i>TBD</i>                                           |
| <b>2.67-2.65</b> | <i>NAA, Asp</i>                                      |
| <b>2.51-2.48</b> | <i>GSH, NAA</i>                                      |
| <b>2.47-2.46</b> | <i>TBD</i>                                           |
| <b>2.45-2.44</b> | <i>Gln</i>                                           |
| <b>2.43-2.41</b> | <i>Gln</i>                                           |
| <b>2.37-2.33</b> | <i>Homocarnosine, Pyr, Glu</i>                       |
| <b>2.30-2.27</b> | <i>GABA</i>                                          |

|                  |                                  |
|------------------|----------------------------------|
| <b>2.16-2.12</b> | <i>GSH, Gln, Glu</i>             |
| <b>2.07-2.05</b> | <i>NAAG</i>                      |
| <b>2.02-2.00</b> | <i>NAA</i>                       |
| <b>1.93-1.90</b> | <i>Acet</i>                      |
| <b>1.89-1.87</b> | <i>GABA, Homocarnosine, NAAG</i> |
| <b>1.49-1.47</b> | <i>Ala</i>                       |
| <b>1.34-1.31</b> | <i>Lac</i>                       |
